# Supplementary material for: Baseline reef health surveys at Bangka Island (North Sulawesi, Indonesia) reveal new threats
Source: PeerJ. 2016 Oct 25;4:e2614. doi: 10.7717/peerj.2614 (PMC5088584; doi:10.7717/peerj.2614)
Supplement: Data S1 — For each sampling transect (10 × 2 m), within all sites and depths (−3, −6 and −9 m), coral diseases and other signs of compromised health, in terms of number of affected colonies per square metre of hard corals (see Table 2 for the meaning of the acronyms), substrates (coral rubble, sand and rocks), main benthic groups and hard coral genera (as of percent cover) have been reported. [file peerj-04-2614-s001.xlsx]

## Sheet: Raw Data
Site	Site.name	Depth	Transect	Label	NI	FB	COTS	GC	SD	AlO	BBD	SEB	BrB	UWS	WS	AtN	BL	FBL	NFBL	PR	TR	GA	BA	AgO	RW	Coral.rubble	Sand	Rocks	Soft.corals	Ascidian.colonial	Ascidian.solitary	Ascidian.social	Sponges.encrusting	Sponges.massive	Sponges.erected	Sponges.boring	Hydroids	Anemones	Gorgonians	Tridacna	Algae	Hard.corals	Acropora	Alveopora	Astreopora	Coeloseris	Ctenactis	Cyphastrea	Diploastrea
1	Coral Eye	-3	t1	Coral Eye-3t1	0	12.5	0	0	0	0	0	0	0	0	6.25	0	6.25	0	0	0	0	0	6.25	0	0	27.4	54.4	5	11.4	0	0.4	0	0.4	0	0	0	0.4	0	0	0	0.2	0.8	0	0	0	0	0	0	0
1	Coral Eye	-3	t2	Coral Eye-3t2	0	0	0	0	0	0	0	0	0	0	0	0	0	0	0	0	0	0	2.5	0	0	33.8	59.2	0	5	0	0	0.4	0	0	0	0	0	0	0	0	0	2	0	0	0	0	0	0	0
1	Coral Eye	-3	t3	Coral Eye-3t3	0	0	0	0	0	0	0	0	0	0	0	0	0	0.757576	0	0	0	0	0	0	0	14.2	42.8	24.2	6.4	2	0.4	5	0	0	0	0	0.4	0	0	0	0	6.6	1.6	0	0	0	0	0	0
1	Coral Eye	-3	t4	Coral Eye-3t4	0	0.555556	0	0	0	0	0	0	0	0	0	0	0	0.555556	0.555556	0	0	0	1.11111	0	0	15.4	28.6	35.4	5	0	0.8	3	0.8	1.4	0	0	4.4	0	0	0	0	9	2	0	0.2	0	0	0	0
1	Coral Eye	-3	t5	Coral Eye-3t5	0	0.294118	0	0	0	0	0	0	0	0	0	0	0	0	0	0	0	0	0.294118	0	0	27.6	13	19.2	21.6	0	0.4	2.4	0	0	0	0	0	0	0	0	0	17	1.8	0	0	0	0	0	0
1	Coral Eye	-6	t1	Coral Eye-6t1	0	2.5	0	0	0	0	0	0	0	0	0	0	0	0	0	0	0	0	7.5	0	0	34.2	34.6	18.2	8.2	0	0.6	2.2	0	0	0	0	0.8	0	0	0	0.6	2	0	0	0	0	0	0	0
1	Coral Eye	-6	t2	Coral Eye-6t2	0	5	0	0	0	0	0	0	0	0	0	0	0	0	0	5	0	0	5	0	0	55.6	42.2	0.2	0	0	0	1.4	0	0	0	0	0	0	0	0	0	1	0.8	0	0	0	0	0	0
1	Coral Eye	-6	t3	Coral Eye-6t3	0	0	0	0.961538	0	0	0	0	0	0	0	0	0	0	0	0	0	0	0	0	0	20	29.6	27.2	8.4	5.8	0.8	4.2	0	0	0	0	0	0	0	0	0	5.2	0.2	0	0	0	0	0	0
1	Coral Eye	-6	t4	Coral Eye-6t4	0	0	0	0	0	0	0	0	0	0	0	0	12.5	0	0	12.5	0	0	0	0	0	36.8	56.2	1	2	1.2	1.2	0.6	1	0	0	0	0	0	0	0	0	0.4	0	0	0.2	0	0	0	0
1	Coral Eye	-6	t5	Coral Eye-6t5	0	0	0	0	0	0	0.297619	0	0	0	0	0	0	0	0	0	0	0	0	0	0	21.2	50.6	6.4	4.2	0	0	0.6	0	0	0	0	0.2	0	0	0	0.2	16.8	0.6	0	0	0	0	0	0
1	Coral Eye	-9	t1	Coral Eye-9t1	8.33333	0	0	8.33333	0	0	0	0	0	0	0	0	0	0	8.33333	0	0	0	8.33333	0	0	62.8	30	6.2	0	0	0	0	0	1	0	0	0	0	0	0	0	0.6	0.2	0	0	0	0	0	0
1	Coral Eye	-9	t2	Coral Eye-9t2	0	0	0	0	0	0	0	4.16667	0	0	0	0	4.16667	0	0	0	0	4.16667	0	0	0	69.4	13.4	2.2	13	0.8	0	0.8	0	0	0	0	0	0	0	0	0	1.2	0	0	0	0	0	0	0
1	Coral Eye	-9	t3	Coral Eye-9t3	0	0.568182	0	0	0	0	0	0	0	0.284091	0	0	0	0.284091	0	0	0	0	0.568182	0	0	10	26.4	21.2	7.6	0.6	3.2	14.2	0	0.4	0	0	0	0	0	0	0.2	17.6	0.2	0	0	0	0	0	0
1	Coral Eye	-9	t4	Coral Eye-9t4	0	0	0	0	0	0	0	0	0	0	0	0	0	0	0	0	0	0	25	0	0	53	36.6	7	0	1.6	0	1.2	0.8	0	0	0	0	0	0	0	0	0.2	0	0	0.2	0	0	0	0
1	Coral Eye	-9	t5	Coral Eye-9t5	0	0	0	0	5	0	0	0	0	0	0	0	0	0	0	0	0	0	0	0	0	57	30	12.2	0	0	0	0	0	0	0	0	0	0	0	0	0	1	0	0	0	0	0	0	0
2	Busabora Kampung	-3	t1	Busabora Kampung-3t1	0	0	0	0	0	0	0	0	0	0	0	0	0	0	0	0	0	0	1.08696	0	0	32.2	12.8	15.4	35.8	0	0	0.2	0	0	0	0	0.2	0	0	0	0.2	4.6	2	0	0	0	0	0	0
2	Busabora Kampung	-3	t2	Busabora Kampung-3t2	1.47059	0	0	0	0	0	0	0	0	0	0.735294	0	1.47059	0	0	0	0	0	0	0	0	11.4	16.6	14.4	51.4	1.2	0	0	0	0	0	0	0	0	0	0.4	0.4	6.8	0	0	0	0.2	0	0	0
2	Busabora Kampung	-3	t3	Busabora Kampung-3t3	0	0	0	0	0	0	0	0	0	0	1.31579	0	5.26316	0	0	0	0	0	0	0	0	27.6	19.6	6.8	43.6	0	0	0	0	0	0	0	0.4	0	0	0	0.6	3.8	0	0	0	0	0	0.2	0
2	Busabora Kampung	-3	t4	Busabora Kampung-3t4	0.147929	0	0	0	0	0	0	0	0	0	0	0	0.147929	0.147929	0	0	0	0	0	0.147929	0	2.6	6.2	14	39.2	0.4	0.4	0	0	0	0	0	6.4	0	0	0	0	33.8	0.2	0	0.8	0	0.2	0	0
2	Busabora Kampung	-3	t5	Busabora Kampung-3t5	0	0	0	0.229358	0	0	0	0	0	0	0	0	0.229358	0	0	0	0	0	0	0	0	26.4	16	11	22.2	1.6	0.2	0.8	0	0	0	0	0.6	0	0	0	0.4	21.8	0.2	0	0	0	0	0	0
2	Busabora Kampung	-6	t1	Busabora Kampung-6t1	0	0	0	0	0	0	0	0	0	0	0.113636	0	0	0.113636	0	0	0	0	0	0	0	11	5	8.8	30.8	0	0.2	0.4	0	0	0	0	0	0	0	0	0.2	44	0	0	0	0	0	0	0
2	Busabora Kampung	-6	t2	Busabora Kampung-6t2	0	0	0	0	12.5	0	0	12.5	0	0	0	0	12.5	0	0	0	0	0	0	0	0	23.6	18.8	30.4	26.2	0.6	0	1.4	0	0	0	0	0	0	0	0	0	0.4	0	0	0	0	0.2	0	0
2	Busabora Kampung	-6	t3	Busabora Kampung-6t3	0	0	0	0	0	0	0	0	0	0	0	0	0	0.684932	0	0	0	0	0	0	0	13.8	37	11.6	23.6	0	0	0.2	0	0	0	0	0	0	0	0	0.2	14.6	0	0	0	0	0	0	0
2	Busabora Kampung	-6	t4	Busabora Kampung-6t4	0	0.242718	0	0	0	0	0	0	0	0.242718	0.242718	0	0.728155	0	0	0	0	0	0.242718	0	0	24.4	6.8	20.6	22.8	2.8	0.6	1.8	1.8	0	0	0	0	0	0	0	0	20.6	0.2	0	0	0	0	0	0
2	Busabora Kampung	-6	t5	Busabora Kampung-6t5	0.292398	0	0	0	0	0	0	0	0	0.146199	0	0	0.292398	0	0	0	0	0	0	0	0	7.8	1.4	35.4	8.6	0.8	0.6	1.4	1.4	0	3	0	7	0	0	0	0.2	34.2	0.2	0	0	0	0	0	0
2	Busabora Kampung	-9	t1	Busabora Kampung-9t1	0	1.92308	0	1.92308	0	0	0	0	0	0	0	0	0	1.92308	1.92308	0	0	0	1.92308	0	0	15.6	29	20	20	14.6	0	0	0	0	0	0	0	0	0	0	0	2.6	0	0	0	0	1.4	0	0.2
2	Busabora Kampung	-9	t2	Busabora Kampung-9t2	0	0	0	0.347222	0	0	0	0	0	0	0	0	0	0	0.347222	0	0	0	0	0.694444	0	2	39.4	22	9.6	9.2	0.2	3	1	0	0	0	0	0	0	0	0	14.4	1.4	0	0	0	0.2	0	0
2	Busabora Kampung	-9	t3	Busabora Kampung-9t3	0.328947	0	0	0	0	0	0	0	0	0	0	0	0	0	0	0	0	0	0	0	0	12.2	36.6	15.4	11.8	4	1	3	0	0.4	0	0	0	1.4	0	0	0	15.2	0	0	0	0	0	0	0
2	Busabora Kampung	-9	t4	Busabora Kampung-9t4	0	0.247525	0	0.247525	0	0.247525	0	0	0	0	0	0	0	0	0.247525	0	0	0	0.49505	0.247525	0.990099	0	0.4	67.8	2	3.6	0.4	0.8	1.2	5.2	0	0	0	0	0	0	0	20.2	0	0	0	0	0	0	0
2	Busabora Kampung	-9	t5	Busabora Kampung-9t5	0	0	0	0	0	0	0	0	0	0	0	0	0.189394	0.568182	0	0	0	0	0	0	0	14	26	16	0.8	2.2	0.2	2.6	0	0	13	0	0	0	0	0	0	26.4	0	0	0	0	0	0	0
3	Tanjung Husi	-3	t1	Tanjung Husi-3t1	0	0	0	0	0	0	0	0	0	0	0	0	1.04167	0	0	0	0	0	0	0	0	0	0.8	38.8	55	0.2	0	0	0	0	0	0	1.4	0	0	0	0	4.8	1.8	0	0	0	0	0	0
3	Tanjung Husi	-3	t2	Tanjung Husi-3t2	0	0	0	0	0.806452	0	0	0	0	0	0	0	0.806452	0	0	0	0	0	0.806452	0	0	0	2.4	40.4	52	0	0	0	0.4	0	0	0	0	0	0	0	0	6.2	2.8	0	0	0	0	0	0
3	Tanjung Husi	-3	t3	Tanjung Husi-3t3	0	0	0	0	0	0	0	0	0	0	0	0	1.38889	0	0	0	0	0	0	0	0	0	0	39.8	46.2	0.4	0	0.8	1.8	2.4	0	0	6	0	0	0	0.2	3.6	0.4	0	0	0	0	0	0
3	Tanjung Husi	-3	t4	Tanjung Husi-3t4	1.08696	0	0	0	0	0	0	0	0	0	0	0	2.17391	0	1.08696	0	0	0	1.08696	0	0	0	3.8	47	44.6	0.2	0	1	0	0	0	0	0.8	0	0	0	0	4.6	1.4	0	0	0	0	0	0
3	Tanjung Husi	-3	t5	Tanjung Husi-3t5	0	0	0	0	0	0	0.862069	0	0	0	0	0	0	0.862069	0	0	0	0	1.72414	0	0	0	21	29.4	40.4	0	0	0.4	0.8	0.4	0	0	0.4	2.2	0	0	0	5.8	0	0	0	0	0	0	0
3	Tanjung Husi	-6	t1	Tanjung Husi-6t1	1.19048	1.19048	0	0	0	0	0	0	0	1.19048	0	0	2.38095	0	0	1.19048	0	0	2.38095	1.19048	0	4.4	0	34.4	41.8	0.6	0.6	5.8	0	0	0	0	9.4	0	0	0	0	4.2	0.8	0	0	0	0	0.4	0
3	Tanjung Husi	-6	t2	Tanjung Husi-6t2	0.409836	1.22951	0	0	0	0	0	0.409836	0	0	0.409836	0	1.22951	0	0	0	0	0	0.819672	0.409836	0	25.8	7.6	47.2	2.6	0.4	0.4	4	1.8	0	0	0	0.2	0	0	0	0	12.2	0.6	0	0	0	0	0	0
3	Tanjung Husi	-6	t3	Tanjung Husi-6t3	0	0	0	0	0	0	0	0	0	0	0	0	1.13636	0.378788	0.757576	0.378788	0	0	0.757576	0	0	0	0.6	40	39	1.8	0.4	0.6	1	3.6	0	0	1	0	0	0	0.4	13.2	7.4	0	0.2	0	0	0.4	0
3	Tanjung Husi	-6	t4	Tanjung Husi-6t4	0.568182	0	0	0	0	0	0	0	0	0	0	0	0.568182	0	0	1.13636	0	0	1.70455	0	0	5.2	2.8	32.4	33.8	1.8	1	3.2	5.8	1.6	0	0	5	0	0	0	0	8.8	0	0	2.2	0	0	0	0
3	Tanjung Husi	-6	t5	Tanjung Husi-6t5	0	0	0	0	0	0	0	0	0	0	0	0	3.125	0	0	0	0	0	0	0	0	0	0	29.2	39.2	2.8	0.4	1.4	2.4	1.8	0	0	9	0	9	0	1.6	4.8	1	0	0	0	0	0	0
3	Tanjung Husi	-9	t1	Tanjung Husi-9t1	0	0.78125	0	0	0	0	0	0	0	0.390625	0	0	0	0	0	0.390625	0	0	1.17188	0	0	2.6	8	50.8	13.2	2	0.6	2.2	6.2	0	0	0	2	0	0	0	0.8	12.8	0	0	0	0	0	0	0
3	Tanjung Husi	-9	t2	Tanjung Husi-9t2	0	3.84615	0	0	0	0	0.961538	0	0	0	0	0	1.92308	0.961538	0	1.92308	0	0	3.84615	0.961538	0	1.8	5	56	22.4	3	0.2	2	1.2	2.4	0	0	0.6	0	1.2	0	0	5.2	1.2	0	0	0	0	0	0
3	Tanjung Husi	-9	t3	Tanjung Husi-9t3	0	0.25	0	0.25	0	0	0	0	0	0	0	0	1.25	0.25	0	0.25	0	0	1.25	0	0	5.4	6.6	27.8	29.2	0.2	0.2	1	1.2	0.4	0	0	10.2	0	0.6	0	0.2	20	1.4	0	0.2	0	0	1	0
3	Tanjung Husi	-9	t4	Tanjung Husi-9t4	0	0.806452	0	0	0	0	0	0	0	0	0.806452	0	0.806452	0	0	0	0	0	0.806452	0	0	9.4	11.8	52.4	8.2	0.4	1.6	3.8	2	2.4	0	0	3.4	0	0	0	0.4	6.2	1	0	0	0	0	0	0
3	Tanjung Husi	-9	t5	Tanjung Husi-9t5	0.735294	0	0	0	0	0	0	0	0	0	0	0	2.94118	0	0	0	0	0	0	0	0	32.2	13.8	26	4.4	1.8	0.4	1.6	4	9.2	0	0	1.2	0	0	0	0	6.8	0	0	0	0	0	0	0
4	Tanjung Husi 2	-3	t1	Tanjung Husi 2-3t1	0.357143	0	0	0	0	0	0	0	0	0	0	0	0.357143	0	0	0	0	0	0	0.357143	0	48.8	1.6	9	25.2	0	0	0.2	0	0	0	0	0	0	0	0	1.4	14	1.8	0	0.2	0	0	0	0
4	Tanjung Husi 2	-3	t2	Tanjung Husi 2-3t2	0.362319	0	0	0	0	0	0	0	0	0.362319	0	0	0	0	0	0	0	0	0	0	0	45.8	0	15.6	21.6	0	0	0	0.6	0	0	0	0	0	0	0	3	13.8	12.6	0	0	0	0	0.8	0
4	Tanjung Husi 2	-3	t3	Tanjung Husi 2-3t3	0.0976562	0	0	0.0976562	0	0	0	0	0	0	0	0	0	0	0	0	0	0	0.0976562	0	0	1.6	0	19.6	20.8	1	0	0	0.6	0	0	0	1.8	0	0	0	4.4	51.2	42	0	0	0	0	0	0
4	Tanjung Husi 2	-3	t4	Tanjung Husi 2-3t4	0.595238	0	0	0	0	0	0	0	0	0.595238	0	0	1.78571	1.19048	0	0.595238	0	0	0	0	0	27.4	0	31.4	29.4	0.6	0.4	0	0	0	0	0	0	0	0	0	3.4	8.4	0	0	1.8	0	0	0	0
4	Tanjung Husi 2	-3	t5	Tanjung Husi 2-3t5	0	0.146199	0	0.146199	0	0	0	0	0	0	0	0	0.292398	0.146199	0.292398	0	0	0	0.292398	0	0	0	2.2	30.2	28.6	0.6	0	0	0	0	0	0	0	4.8	0	0	1.2	34.2	1	0.2	0	0	0	0	0
4	Tanjung Husi 2	-6	t1	Tanjung Husi 2-6t1	0	1.04167	0	0	0	0	0	0	0	0	0	0	1.04167	4.16667	0	0	0	0	0	0	0	66.8	9.8	16.4	2.2	0	0.6	0	0	0	0	0	0	0	0	0	0.2	4.8	0.2	0	0	0	0.2	0	0
4	Tanjung Husi 2	-6	t2	Tanjung Husi 2-6t2	0	0	0	0	0	0	0	0	0	0	0	0	0	0	0	0	0	0	2.77778	0	0	65.6	8.8	14.6	9.4	0	0	0	0	0	0	0	0	0	0	0	0	1.8	0	0	0	0	0	0	0
4	Tanjung Husi 2	-6	t3	Tanjung Husi 2-6t3	0.15015	0	0	0	0	0	0	0	0	0	0	0	0.0750751	0.0750751	0	0	0	0	0	0	0	0.4	6	26.4	1.2	0	0	0	0	0	0	0	0	0	0	0	0.2	66.6	0	0	0	0	1.6	0	7.4
4	Tanjung Husi 2	-6	t4	Tanjung Husi 2-6t4	0	0	0	0	0	0	0	0	0	0	0	0	0.255102	0	0	0.255102	0	0	0.255102	0	0	17.4	0	52.2	3	1.8	0.2	1.4	0	4	0	0	0	0	0	0	0.8	19.6	0.8	0	0	0	0	0	14.4
4	Tanjung Husi 2	-6	t5	Tanjung Husi 2-6t5	0	0	0	0	0	0	0	0	0	0	0	0	2.77778	0	0	0	0	0	5.55556	0	0	58.2	8.4	28.2	0.6	0	0.2	0	0	3	0	0	0	0	0	0	0	1.8	0	0	0.2	0	0	0	0
4	Tanjung Husi 2	-9	t1	Tanjung Husi 2-9t1	0	0	0	0	0	0	0	0	0	0.833333	0	0	0.833333	0	0	0	0	0	0.833333	0	0	22.8	45.4	24	0.6	0.8	0	0	0	0.6	0	0	0	0	0	0	0	6	0	0	0.2	0	0	0	0
4	Tanjung Husi 2	-9	t2	Tanjung Husi 2-9t2	0	0	0	0	0	0	0	0	0	0	0.757576	0	4.54545	0.757576	0	0	0	0	0	0.757576	0	42	12.8	37.6	0.8	0.6	0.2	0	0.4	0	0	0	0	0	0	0	0	6.6	0	0	0	0	0	0.2	0
4	Tanjung Husi 2	-9	t3	Tanjung Husi 2-9t3	0	0	0	0	0	0	0	0	0	0	0	0	1.92308	0	0	0.641026	0	0	0	0	0	37.8	0	31.2	17.8	0.8	0.2	0.6	0.2	0.4	3.4	0	0	0	0	0	0.2	7.8	0	0	0.8	0	0	0	0
4	Tanjung Husi 2	-9	t4	Tanjung Husi 2-9t4	0	0	0	0	0	0	0	0	0	0	0	0	2.20588	0	0	0.735294	0	0	0.735294	0.735294	0	27.6	12.4	50.2	1.2	0.8	0.2	0.4	0.2	0.6	0.2	0	0	0	0	0	0.2	6.8	0	0	0	0	0	0.2	0
4	Tanjung Husi 2	-9	t5	Tanjung Husi 2-9t5	0	0	0	0	0	0	0	0	0	0	0	0	1.78571	0	0	0	0	0	0.892857	0.892857	0	21.4	7.4	54.6	5	3.6	0.8	0.8	0.6	0	0	0	0	1	0	0	0	5.6	0.2	0	0	0	0	0	0
5	Mangrove Forest	-3	t1	Mangrove Forest-3t1	0	0.892857	0	0	0	0	0	0	0	0	0	0	2.67857	0	0	0	0	0	0	0	0	21.6	22.6	41	4	1	0.4	1.4	0	0	0	0	4.8	0	0	0	0.2	5.6	0	0	3.6	0	0	0.2	0
5	Mangrove Forest	-3	t2	Mangrove Forest-3t2	0	0.446429	0	0	0	0	0	0	0	0	0	0	0.446429	0	0	0	0	0	1.33929	0	0	28.2	13.4	33.2	2.4	2	0.4	1.4	0	6	0	0	0.4	3.2	0	0	0	11.2	0.6	0	0.6	0.2	0	0	0
5	Mangrove Forest	-3	t3	Mangrove Forest-3t3	0.688073	0	0	0.229358	0.688073	0	0	0	0	0	0	0	1.14679	0.229358	0	0	0	0.229358	0.688073	0.229358	0	10.4	28.8	28.4	9.2	0.4	0.4	0.8	0	0	0	0	1.4	0	0	0	0	21.8	3.2	0	1.2	0	0	0	0
5	Mangrove Forest	-3	t4	Mangrove Forest-3t4	0.297619	0	0	0	0	0	0	0	0	0	0	0	2.08333	0.297619	0	0	0	0	0	0	0	17.6	19.4	41.8	4	0	0	1.4	0	0	0	0	0	0	0	0	0	16.8	0	0	0	0.2	0	0	0
5	Mangrove Forest	-3	t5	Mangrove Forest-3t5	0.877193	0	0	0.438596	0	0	0.438596	0	0	0	0	0	0.877193	0	0	0	0	0	1.31579	0.877193	0	25.4	10	26.8	25.8	0.4	0	1.2	0	0.6	0	0	0	0	0	0	0	11.4	0.6	0	0.6	0	0	0.2	0
5	Mangrove Forest	-6	t1	Mangrove Forest-6t1	0.301205	0.903614	0	0.301205	0	0	0	0	0	0	0	0	0	0	0	0.301205	0	0	0.903614	0.60241	0	23.4	5	42.6	0.2	0	1.8	3.8	0	0	0	0	2.4	2.2	0	0	4.2	16.6	0.4	0	0	0	0	0.6	0
5	Mangrove Forest	-6	t2	Mangrove Forest-6t2	0.378788	0	0	0	0.378788	0	0	0	0	0	0	0	0	0	0	0	0	0	0	0	0	13.6	31.2	38.8	0	0	0.4	3	0.6	0.6	0	0	0	0	0	0	0	13.2	11.4	0	0	0	0	0.2	0
5	Mangrove Forest	-6	t3	Mangrove Forest-6t3	0	0	0	0	0	0	0	0	0	0	0.206612	0	0.619835	0	0.206612	0	0	0	0	0	0	42.4	5	27.2	0	0.2	0.2	1.2	0.4	0	0	0	0	0	0	0	0.2	24.2	0	0	0	0	0	0	0
5	Mangrove Forest	-6	t4	Mangrove Forest-6t4	0	0	0	0	0	0	0	0	0	0	0	0	0	0	0	0	0	0	0	0	0	24.8	38	29	0	0	1.2	1.6	0	0	0	0	0	0	0	0	0	6.8	0	0	0	0	0	0	0
5	Mangrove Forest	-6	t5	Mangrove Forest-6t5	0	0	0	0	0	0	0	0	0	0	0	0	1.08696	0	0	0	0	0	1.08696	0	0	42.6	27.4	21	0	0.6	0.4	2.2	0	1.6	0	0	0	0	0	0	0	4.6	0.8	0	0	0	0	0	0
5	Mangrove Forest	-9	t1	Mangrove Forest-9t1	0	0	0	0	0	0	0	0	0	0	0	0	0	0	0	0	0	0	0	0	0	22.4	46.6	14.4	1.2	0	1	1.8	0.4	8.8	0	0	0	0	0	0	0	3.8	0	0	0	0	0	0	0
5	Mangrove Forest	-9	t2	Mangrove Forest-9t2	0	0.362319	0	0	0	0	0	0	0.362319	0	0	0	0.724638	0	0	0	0	0	1.08696	0.362319	0	18	33.8	30.6	0.2	0.2	1.2	3	0	0	0	0	0	0	0	0	0.2	13.8	2.2	0	0	0	0	0	0
5	Mangrove Forest	-9	t3	Mangrove Forest-9t3	0	1.13636	0	0	0	0	0	0	0	1.13636	0	0	1.13636	0	0	0	0	0	0	0	0	17.8	74	0	1.2	0.6	0.2	1.8	0	0	0	0	0	0	0	0	0.4	4.4	1.4	0	0	0	0	0	0
5	Mangrove Forest	-9	t4	Mangrove Forest-9t4	0	0	0	0	0	0	0	0	0	0	0	0	0	0	0	0	0	0	3.57143	0	0	26.6	67.6	4	0	0	0	0.6	0	0	0	0	0	0	0	0	0	1.4	0	0	0.2	0	0	0	0
5	Mangrove Forest	-9	t5	Mangrove Forest-9t5	6.25	6.25	0	0	0	0	0	0	0	0	0	0	0	0	0	0	0	0	6.25	6.25	0	34.8	62.4	0	2	0	0.4	0	0	0	0	0	0	0	0	0	0	0.8	0	0	0	0	0	0	0
6	Pearl Garden	-3	t1	Pearl Garden-3t1	0.480769	0.961538	0	0	0	0	0	0	0	0	0.480769	0	0.961538	0	0	0	0	1.92308	0.480769	0	0	9.6	45	20.2	14.6	0	0	0.6	0	0	0	0	0	0	0	0	0	10.4	0.4	0	0	0	0	0	0
6	Pearl Garden	-3	t2	Pearl Garden-3t2	4.54545	0	0	0	2.27273	0	0	0	0	0	0	0	2.27273	0	0	0	0	0	0	0	0	8	85	4.2	1.2	0	0	0	0	0	0	0	0	0	0	0	0	2.2	2	0	0	0	0	0	0
6	Pearl Garden	-3	t3	Pearl Garden-3t3	NA	NA	NA	NA	NA	NA	NA	NA	NA	NA	NA	NA	NA	NA	NA	NA	NA	NA	NA	NA	NA	17.8	73	7	1.6	0	0.6	0	0	0	0	0	0	0	0	0	0	0	0	0	0	0	0	0	0
6	Pearl Garden	-3	t4	Pearl Garden-3t4	0	0	0	0	0	0	0	0	0	0	0	0	1.78571	0	0.892857	0	0	0.892857	0	0	0	27.8	34	25.8	3.4	0	0	3	0.4	0	0	0	0	0	0	0	0.2	5.6	0	0	0.4	0	0	0	0
6	Pearl Garden	-3	t5	Pearl Garden-3t5	0	0	0	0	0	0	0	0	0	0	0	0	0	0	0	0	0	0	0	0	0	17.4	25.2	22.6	13.6	0.2	0	1.4	0	0	0	0	0	0	0	0	0.2	19.4	0	0	0	0	0	0	0
6	Pearl Garden	-6	t1	Pearl Garden-6t1	0	0.268817	0.134409	0.403226	0	0	0	0	0	0	0	0	0.403226	0	0	0	0	0.672043	0	0.134409	0	27.6	31	2.6	0.2	0.2	0.2	1	0	0	0	0	0	0	0	0	0	37.2	36	0	0	0	0	0	0
6	Pearl Garden	-6	t2	Pearl Garden-6t2	0.238095	0.238095	0	0.238095	0.238095	0	0	0	0	0	0	0	1.19048	0	0	0	0	1.19048	0	0	0	5.2	33.4	31.6	3	2.2	0.6	3.4	0	0	0	0	0	0	0	0	0	21	3.8	0	0.4	0	0	0	0
6	Pearl Garden	-6	t3	Pearl Garden-6t3	0	0.438596	0	0	0.877193	0	0	0	0	0	0	0	0.438596	0	0	0	0	0.438596	0.877193	0	0	19.8	59.4	2.2	0.8	0	0.2	0.6	0	0	0	0	6	0	0	0	0	11.4	0	0	0	0	0	0	0
6	Pearl Garden	-6	t4	Pearl Garden-6t4	1.47059	0.735294	0	0	0	0	0	0	0	0	0	0	2.94118	0	0	0.735294	0	2.94118	0	0.735294	0	3.4	50.4	25.4	12.2	0	0	1	0	0	0	0	1.4	0	0	0	0	6.8	4.4	0	0.4	0	0	0	0
6	Pearl Garden	-6	t5	Pearl Garden-6t5	NA	NA	NA	NA	NA	NA	NA	NA	NA	NA	NA	NA	NA	NA	NA	NA	NA	NA	NA	NA	NA	10.2	64.4	6.8	15.2	0	0.2	1.6	0	1.6	0	0	0	0	0	0	0	0	0	0	0	0	0	0	0
6	Pearl Garden	-9	t1	Pearl Garden-9t1	0	0	0	0	0	0	0	0.378788	0	0	0	0	1.13636	0	0	0	0	0	1.13636	0.378788	0	16.2	27.2	38.4	0.6	1.2	1.2	2	0	0	0	0	0	0	0	0	0.2	13.2	1.8	0	0	0	0	0	0
6	Pearl Garden	-9	t2	Pearl Garden-9t2	0	0	0	0	0.211864	0	0	0	0	0	0	0	0.211864	0	0	0	0	0	0.211864	0	0	5.4	12	47	0.4	1.4	1	2.6	0	0.2	0	0	7	0	0	0	0	23.6	4	0	0.6	0	0	0	0
6	Pearl Garden	-9	t3	Pearl Garden-9t3	0	0.462963	0	0	0	0	0	0	0	0	0	0	0.925926	0	0	0	0	0	0.462963	0	0	19.8	39.6	20.2	2.4	0	0.8	0.4	0	0	0	0	6.2	0	0	0	0	10.8	0	0	0	0	0	0	0
6	Pearl Garden	-9	t4	Pearl Garden-9t4	0	0	0	0	0	0	0	0	0	0	0	0	0.531915	0	0	0	0	0.531915	0	0	0	5.8	78.4	5.8	0	0.6	0.4	0	0	0	0	0	0	0	0	0	0	9.4	9.2	0	0	0	0	0	0
6	Pearl Garden	-9	t5	Pearl Garden-9t5	0	0	0	0	0	0	0	0	0	0	0	0	3.44828	0	0	0	0	2.58621	0	0	0	0.8	77.6	5.6	6.6	0.2	0.8	1.6	0	0	1.6	0	0	0	0	0	0	5.8	0	0.6	0	0	0	0	0
7	Batu Gosoh	-3	t1	Batu Gosoh-3t1	0.526316	0	0	0.131579	0	0	0	0	0	0.131579	0	0	0.526316	0.131579	0.131579	0.131579	0	0.131579	0.263158	0.263158	0	0	2.4	20.6	27.8	7	0	0	3.4	0	0	0	0	0	0	0	2	38	0.6	1	0	0	0	0	0
7	Batu Gosoh	-3	t2	Batu Gosoh-3t2	0	0	0	0.157233	0	0	0	0	0	0	0	0	0.471698	0	0	0	0	0	0.157233	0	0	0	1.4	18	39.2	5.4	0	0.2	4.4	0	0	0	0	0	0	0	0	31.8	1.8	0	0	0	0	0	0
7	Batu Gosoh	-3	t3	Batu Gosoh-3t3	0	0	0	0	0	0	0	0	0	0	0	0	0.649351	0	0	0.324675	0	0	0.324675	0	0	0	7.8	29.2	42.6	1.2	0	1.6	2.6	0	0	0	0	0	0	0	0	15.4	0	0	12	0	0	0	0
7	Batu Gosoh	-3	t4	Batu Gosoh-3t4	0.847458	0	0	0	0	0	0	0	0	0	0	0	0.423729	0	0	0	0	0	0.423729	0	0	0	1.2	65.8	16.2	2.8	0	1.4	1.2	0	0	0	0	0	0	0	0.4	11.8	1.4	0	0	0	0	0	0
7	Batu Gosoh	-3	t5	Batu Gosoh-3t5	0	0	0	0.373134	0	0	0	0	0	0	0	0	0.746269	0	0	0	0	0	0.373134	0.373134	0	0	0	32.8	46.4	0.6	1.8	0.8	2.2	0	0	0	2.6	0	0	0	0.2	13.4	0.2	0	0	0	0	0	0
7	Batu Gosoh	-6	t1	Batu Gosoh-6t1	0.113122	0	0	0.113122	0	0	0	0	0	0	0	0.113122	0.678733	0	0	0	0	0	0.226244	0	0	0	0	37.2	7	6.4	0	3.2	2.4	0	0	0	0.4	0	0	0	0	44.2	12.4	0	0	3	0	0	0
7	Batu Gosoh	-6	t2	Batu Gosoh-6t2	0	0	0	0	0	0	0	0	0	0	0	0	1.15385	0	0	0	0	0	0	0	0	0	1.8	48.8	21	8.4	0.2	1.8	4	0	0	0	0	1.6	0	0	0	13	7.4	0	0.2	0	0	0	0
7	Batu Gosoh	-6	t3	Batu Gosoh-6t3	0	0	0	0	0	0	0	0	0	0	0	0	0	0	0	0	0	0	0	0	0	0	5	33.6	34.2	5.4	0.4	2	0	0	0	0	11	0	0	0	0	9	0	0	0	0	0	0	0
7	Batu Gosoh	-6	t4	Batu Gosoh-6t4	1.47059	0	0	0	0	0	0	0	0	0	0	0	0	0	0	1.47059	0	0	0	0	0	9	8	46	24.4	8.8	0	0.8	0	0	0	0	0	0	0	0	0	3.4	1.8	0	0	0	0	0	0
7	Batu Gosoh	-6	t5	Batu Gosoh-6t5	0	0	0	0.304878	0	0	0	0	0	0	0	0	0.304878	0	0	0	0	0	0.304878	0	0	0	0	55.8	8.8	2.6	0.4	5.8	0	0	0	0	11.2	0	0	0	0	16.4	0	0	0.2	0	0	0	0
7	Batu Gosoh	-9	t1	Batu Gosoh-9t1	0	0	0	0	0	0	0	0	0	0	0	0	5.83333	0	0	0	0	0	2.5	0	0	12	2.6	29.2	28.2	10.4	0.2	4.8	7.8	0	0	0	0.4	0	0	0	0	6	0	0	0.2	0	0	0	0
7	Batu Gosoh	-9	t2	Batu Gosoh-9t2	0	0	0	1.66667	0	0	0	0	0	0	0	0	1.66667	0	0	0	0	0	0	0	0	0	9	60.8	16.8	0.2	0	1	2.4	0	0	0	6.2	0	1	0	0	3	0.2	0	0	0	0	0	0
7	Batu Gosoh	-9	t3	Batu Gosoh-9t3	0	0	0	0	0	0	0	0	0	0	0	0	0	0	0	0	0	0	0	0	0	0.6	17.4	69.8	0.6	0.8	0	0.8	0	0	0	0	2.2	0	0	0	0	8.2	0	0	0	0	0	0	6
7	Batu Gosoh	-9	t4	Batu Gosoh-9t4	0	0.177305	0	0	0	0	0	0	0	0	0	0	0.35461	0.177305	0.177305	0	0	0	0	0.177305	0	8.2	5.2	46.6	4.8	0.4	0	0.4	1.4	0	0	0	5.6	0	0	0	0	28.2	0	0	0	0	0	0	0
7	Batu Gosoh	-9	t5	Batu Gosoh-9t5	0	0	0	0	0	0	0	0	0	0	0	0	3.7037	0	0	0	0	0	0.925926	0	0	0	6.2	55	23	1.6	0.8	1.8	3	0.2	0	0	3.4	0	0	0	0.4	5.4	0	0	0	0	0	0	0
8	Sipi	-3	t1	Sipi-3t1	0	0.438596	0	0	0	0	0	0	0	0	0	0	3.07018	0	0	0.877193	0	2.19298	1.31579	0	0	4.6	30.8	29	15.4	0.4	1	0.4	0	6.2	0.8	0	0.6	0	0	0	0.8	11.4	0.4	0	1.4	0	0	0.2	0
8	Sipi	-3	t2	Sipi-3t2	0.211864	0	0	0	0	0	0	0	0	0	0.211864	0	1.48305	0	0	0.211864	0	1.69492	0.211864	0	0	10.2	18.4	44.4	0.6	0.4	0.4	0.2	0.2	0	2	0	0.4	0	0	0	0.4	23.6	12.8	0	0.2	0	0	0	0
8	Sipi	-3	t3	Sipi-3t3	0	0	0	0	0	0	0	0	0	0	0	0	0.819672	0	0	0	0	0.819672	0	0	0	27.4	21.2	35.2	0.2	1.8	0.8	0.4	0	1.4	0	0	0	0	0	0	0.4	12.2	0.2	0	0	0	0	0	0
8	Sipi	-3	t4	Sipi-3t4	0	0	0	0.555556	0.555556	0	0	0	0	0	0	0	2.22222	0.555556	0.555556	0	0	2.77778	0	0	0	37.4	18.2	30	0	5.6	0.4	0.2	0	0	0.4	0	0	0	0	0	0.2	9	3.8	0	0	0	0	0	0
8	Sipi	-3	t5	Sipi-3t5	0	0.396825	0	0.396825	0	0	0	0	0	0	0	0	1.98413	0.396825	0	0	0	1.19048	0.396825	0	0.396825	17	29.4	32.4	0	7.8	0	0	0	1.6	0	0	0.4	0	0	0	0.6	12.6	1.8	0.4	0.4	0	0	0	0
8	Sipi	-6	t1	Sipi-6t1	0.833333	0.833333	0	0	0	0	0	0	0	0	0	0	2.5	0	0	0	0	0.833333	0.833333	0	0	30.2	28	25.8	4	3.8	1	1	0	0	0.4	0	0	0	0	0	0.6	6	4.4	0	0	0	0	0	0
8	Sipi	-6	t2	Sipi-6t2	0	0	0	0	0	0	0	0	0	0	0	0	0.416667	0	0	0	0	0	0	0	0	28.6	44.8	13.2	0.8	0.2	0.2	0.2	0	0	0	0	0	0	0	0	0.4	12	9	0	0	0	0	0	0
8	Sipi	-6	t3	Sipi-6t3	0	0	0	0	0	0	0	0	0	0	0	0	0	0.581395	0	0	0	0.581395	0	0.581395	0	23.8	15.8	45	0	5.6	0.2	0.4	0	0	0.4	0	0.6	0	0	0	0	8.6	0	0	0	0	0	0	0
8	Sipi	-6	t4	Sipi-6t4	0	1.31579	0	0	0	0	0	0	0	0	0	0	1.31579	0	0	0	0	0	0	0	0	49.4	14.6	9.2	0	20.6	0.4	0.4	0	0	0.2	0	0	0	0	0	2	3.8	2.8	0	0	0	0	0	0
8	Sipi	-6	t5	Sipi-6t5	0	0	0	0	0	0	0	0	0	0	0	0	0.925926	0	0	0	0	0	0	0	0	4.6	44.2	30.8	2	6	0.6	0.6	0.8	0	0	0	0	0	0	0	0.4	10.8	2.6	0	0.2	0	0	0	0
8	Sipi	-9	t1	Sipi-9t1	0.245098	0	0	0	0	0	0	0	0	0	0	0	0.490196	0	0.245098	0	0	0.490196	0	0	0	4.8	48.2	20.6	0	0.4	0.8	1	1.4	3.8	0	0	0	0	0	0	0	20.4	0	0	0	0	0	0	1.4
8	Sipi	-9	t2	Sipi-9t2	0	0	0	0	0	0	0	0	0	0	0	0	0	0	0	0	0	2.63158	1.31579	0	0	22.2	38.4	29.6	0	2.4	1.6	2	0	0	0	0	0	0	0	0	0.4	3.8	0.6	0	0	0	0	0	0
8	Sipi	-9	t3	Sipi-9t3	0	1.13636	0	0.568182	0	0	0	0	0	0	0	0	0	0	0	0	0	0	0.568182	0.568182	0	28.2	53.4	5	0	0	0.4	0.8	2.6	0.6	0	0	0	0	0	0.8	0	8.8	0	0	0	0	0	0	0
8	Sipi	-9	t4	Sipi-9t4	0.189394	0	0	0	0.189394	0	0	0	0	0	0	0	1.13636	0	0	0	0	0.568182	0	0	0	3	1.6	53.6	0	10.2	1.4	2.6	2.2	0	0	0	0	0	0	0	0.6	26.4	5.2	0	0	0	0	0.2	0
8	Sipi	-9	t5	Sipi-9t5	0	0	0	0.109649	0.109649	0	0	0	0	0.109649	0	0	0.328947	0	0.109649	0	0	0.219298	0	0.109649	0.219298	0	16.8	19.6	2.2	14.2	1.8	1	0	0	0	0	0	0	0	0	0	45.6	0	0	0.4	0	0	0	0
9	Batu Kapal	-3	t1	Batu Kapal-3t1	0	0	0	0	0	0	0	0	0	0	0	0	0.961538	0	0	0	0	0	0	0	0	2.2	8.6	17.6	66.6	0	0	0	0	0	0	0	0	0	0	0	0	5.2	0	0	0	0	0	0	0
9	Batu Kapal	-3	t2	Batu Kapal-3t2	0.284091	0	0	0	0	0	0	0	0	0	0	0	0.852273	0.284091	0.284091	0	0	0	0	0	0	0	4	42.4	34.8	0	0.2	0.2	0	0	0	0	0	0	0	0	2	17.6	0	0	0.2	0	0	0	0
9	Batu Kapal	-3	t3	Batu Kapal-3t3	0	0.252525	0	0	0	0	0	0	0	0	0.252525	0	0.757576	0	0	0.252525	0	0	0.505051	0	0	0	15.2	45.2	19.2	0	0.4	0	0	0	0	0	0	0	0	0	1.4	19.8	0.2	0	0	0	0	0	0
9	Batu Kapal	-3	t4	Batu Kapal-3t4	0	0.431034	0	0	0	0	0	0	0	0	0	0	1.2931	0	0.215517	0	0	0	0.431034	0.215517	0	12	9	41.8	11.6	0	0	0	0	0	0	0	0	0	0	0	4.4	23.2	0.6	0	0	0	0	0	0
9	Batu Kapal	-3	t5	Batu Kapal-3t5	0	0.297619	0	0.297619	0	0	0	0	0	0.297619	0	0	0.595238	0	0	0	0	0	0.297619	0	0	8.6	12.4	47.8	15.2	0.2	0	0	0	0	0	0	0	0	0	0	0.8	16.8	0	0	4.4	0	0	0	0
9	Batu Kapal	-6	t1	Batu Kapal-6t1	0	0	0	0.347222	0	0	0	0	0	0	0.347222	0	0.694444	0	0	0	0	0	0	0.347222	0	0	19.6	43.2	19.6	1.4	0.8	0.8	0	0	0	0	0	0	0	0	1.6	14.4	1.8	0	0	0	0	0	5.2
9	Batu Kapal	-6	t2	Batu Kapal-6t2	0	0	0	0	0	0	0	0	0	0	0.362319	0	1.08696	0	0	0	0	0	0	0	0	4.4	35.4	30.4	13.2	1.4	0.2	0.6	0	0	0	0	0	0	0	0	1.2	13.8	0	0	0	0	0	0	0
9	Batu Kapal	-6	t3	Batu Kapal-6t3	0	0	0	0	0	0	0	0	0	0.757576	0	0	3.78788	0	0	1.51515	0	0	0.757576	0	0	0.6	25.4	25.6	41	0.4	0.2	0.6	0	0	0	0	0	0	0	0	0.6	6.6	0	0	0	0	0	0	0
9	Batu Kapal	-6	t4	Batu Kapal-6t4	0	0	0	0	0	0	0	0	0	0	0	0	0.421348	0	0	0.140449	0	0	0	0	0	18.8	25.6	15.8	3.2	1	0.4	0.4	0	0	0	0	0	0	0	0	0.6	35.6	14.6	0	0	0	0	0	20
9	Batu Kapal	-6	t5	Batu Kapal-6t5	0	0	0	0	0	0	0	0	0	0	0	0	7.14286	0	0	3.57143	0	0	3.57143	0	0	24.2	56.2	10.4	6.6	1.6	0	0	0	0	0	0	0	0	0	0	0	1.4	0	0	0	0	0	0	0
9	Batu Kapal	-9	t1	Batu Kapal-9t1	0	0	0	0	0	0	0	0	0	0	0	0	0	0	0	0	0	0	1	0	0	3.6	78.4	9.6	0	0	1.4	2	0	0	0	0	0	0	0	0	0	5	0	0	0	0	0	0	0
9	Batu Kapal	-9	t2	Batu Kapal-9t2	0	0	0	0	0	0	0	0	0	0	0	0	0	0	0	0	0	0	0	0	0	0	80.6	16.4	1.4	0	0	1	0	0	0	0	0	0	0	0	0	0.6	0.6	0	0	0	0	0	0
9	Batu Kapal	-9	t3	Batu Kapal-9t3	0	0	0	0	0	0	0	0	0	0	0	0	0	0	0	0	0	0	0	0	0	0	62.6	0	36.8	0	0	0.2	0	0	0	0	0	0	0	0	0	0.4	0	0	0	0	0	0	0
9	Batu Kapal	-9	t4	Batu Kapal-9t4	0	0	0	0	0	0	0	0	0	0	0	0	2.63158	0	0	0	0	1.31579	0	0	0	13.2	51.6	22.2	9.4	0	0	0.2	0.6	0	0	0	0	0	0	0	0.2	3.8	0	0	0	0	0	0	0
9	Batu Kapal	-9	t5	Batu Kapal-9t5	0.714286	0	0	0	0	0	0	0	0	0	0	0	0.714286	0	0	0	0	0	0	0	0	2.2	42.8	36	3.2	6.8	0.8	0.6	0	1.6	0	0	0	0	0	0	0.2	7	0	0	0	0	0	0	0
10	Areng Kambing	-3	t1	Areng Kambing-3t1	0	1.5625	0	1.5625	0	0	0	0	0	0	0	0	1.5625	1.5625	0	0	0	0	1.5625	0	0	0	0	69.2	25.2	0	0.6	2.6	0	0	0	0	0	0	0	0	0	3.2	0	0	0	0	0	0	0
10	Areng Kambing	-3	t2	Areng Kambing-3t2	0	0	0	0	0	0	0	0	0	1.13636	0	0	0	0	0	0	0	0	0	0	0	0	0	69.6	19.6	0	0.6	4.8	2	0	0	0	0	0	0	0	0	4.4	0	0	0	0	0	0	0
10	Areng Kambing	-3	t3	Areng Kambing-3t3	0	0	0	0.675676	0	0	0	0	0	0	0	0	0	0	0	0	0	0	0	0	0	0	0	86.2	4	0	0	1.2	1.8	0	0	0	0	0	0	0	0	7.4	0	0	0	0	0	0	0
10	Areng Kambing	-3	t4	Areng Kambing-3t4	0	0	0	1.78571	0	0	0	0	0	0	0	0	0	1.78571	0	0	0	0	3.57143	0	0	0	0	95.6	0	0	0.4	0.2	1.4	0.4	0	0	0	0	0	0	0	2.8	0	0	0	0	0	0	0
10	Areng Kambing	-3	t5	Areng Kambing-3t5	0	0	0	1.04167	0	0	0	0	0	0	0	0	1.04167	0	0	0	0	0	0.520833	0	0	0	0	79	2	2.6	0.2	6.2	0	1.2	0	0	0	0	0	0	0	9.6	1.4	0	0	0	0	0	0
10	Areng Kambing	-6	t1	Areng Kambing-6t1	0.438596	0.438596	0	0	0	0	0	0	0	0	0	0	1.75439	0	0.877193	0	0	0	0.877193	0	0	0	0	61.4	21	1.2	0.4	2.4	0	0.4	0	0	0	0	0	0	3	11.4	0	0	0.2	0	0	0	0
10	Areng Kambing	-6	t2	Areng Kambing-6t2	0.223214	0	0	0.223214	0.223214	0	0	0	0	0	0	0	0.669643	0	0.223214	0	0	0	0.446429	0	0	0	0	49	24.4	0.4	0.8	3	0	0.4	0	0	0	0	0	0	1.4	22.4	0	0.4	0.2	0	0	0	3.2
10	Areng Kambing	-6	t3	Areng Kambing-6t3	0	0	0	0	0.520833	0	0	0	0	0	0	0	0	0	0.520833	0	0	0	1.04167	0.520833	0	0	0	46.2	38.8	1.2	1.4	2.2	1.6	0	0	0	0	0	0	0	0	9.6	0.2	0	0	0	0	0	0
10	Areng Kambing	-6	t4	Areng Kambing-6t4	0	0.308642	0	0.308642	0	0	0	0	0	0	0	0	0.617284	0.308642	0	0	0	0	0.617284	0	0	0	0	56.8	23.2	0.8	0.4	1.8	0	0.6	0	0	0.2	0	0	0	0.4	16.2	0.4	0	0	0	0	0	0
10	Areng Kambing	-6	t5	Areng Kambing-6t5	0	0	0	0.3125	0	0	0	0	0	0.625	0	0	0.9375	0	0	0	0	0	0	0	0	0	0	61.6	3	0	1.4	7.6	0	0	0.4	0	11.8	0	0	0	0	16	0.2	0	0	0	0	0	0
10	Areng Kambing	-9	t1	Areng Kambing-9t1	0.510204	0	0	0	0.510204	0	0	0	0	0	0	0	1.02041	0	0	0	0	0	0.510204	0	0	0	0	54.8	34.4	0	0.4	0.4	0	0	0	0	0	0	0	0	1.4	9.8	0	0	1.2	0	0	0.2	4
10	Areng Kambing	-9	t2	Areng Kambing-9t2	0	0	0	0	2.41935	0	0	0	0	0.806452	0.806452	0	3.22581	0	0	0.806452	0	0	1.6129	0.806452	0	0	0	55.6	33.6	0.6	0.8	0.6	1	0	0	0	0	0	0	0	2.8	6.2	0	0	0.2	0	0	0.2	0
10	Areng Kambing	-9	t3	Areng Kambing-9t3	0	0	0	0	0	0	0.242718	0	0	0	0	0	0.242718	0	0	0	0	0	0	0	0	0	0	63.6	11.8	0.6	1.8	1.4	0	0.6	0	0	0	0	0	0	0.2	20.6	0	0	0	0	0	0	0
10	Areng Kambing	-9	t4	Areng Kambing-9t4	0	0	0	0.735294	0	0	0	0	0	0	0	0	2.94118	0	0	0	0	0	0.735294	0	0	0	0	71	4.4	12.2	1.8	1.8	0	2.2	0	0	0	0	0	0	1	6.8	0.2	0	0	0	0	0	0
10	Areng Kambing	-9	t5	Areng Kambing-9t5	0	0	0	0.280899	0	0	0	0	0	0.280899	0	0	1.40449	0	0	0	0	0	0.280899	0.280899	0	0	0	75	0.8	3.2	1	2.8	0.6	0	0	0	0	0	0	0	0.2	17.8	0	0	0	0	0	0	0
[truncated: 36 more columns]
